# Supplementary material for: Diagnosing the stratospheric proportion in tropospheric ozone using triple oxygen isotopes as tracers
Source: Copernicus journal article supplement (doi:10.5194/acp-2021-1099), 2022-04-26
Supplement: Supplementary file 1 [file acp-2021-1099-supplement.zip]

# Diagnosing the stratospheric proportion in tropospheric ozone using triple oxygen isotopes as tracers

Hao Xu et al.

Correspondence to: Hao Xu (xuhao1990kyokou@hotmail.co.jp)

· Table S1

· Figure S1

· Table S2

**Table S1.** The  $\Delta^{17}\text{O}$  of  $\text{O}_3$  in terminal positions defined by the power law ( $\Delta^{17}\text{O}_{\text{term}}(\text{O}_3)$ ) and the linear ( $\Delta^{17}\text{O}_{\text{term}}(\text{O}_3)^*$ ;  $\Delta^{17}\text{O} = \delta^{17}\text{O} - 0.52 \times \delta^{18}\text{O}$ ) are reported for the ozone collections in Niigata and Nagoya. The standard deviations associated with the mean values are presented for the  $\delta^{18}\text{O}$  and  $\Delta^{17}\text{O}$ .

| Location &<br>(collection period <sup>a</sup> ) | <i>n</i> | $10^3 \delta^{18}\text{O}_{\text{term}}(\text{O}_3)$ | $10^3 \Delta^{17}\text{O}_{\text{term}}(\text{O}_3)$ | $10^3 \Delta^{17}\text{O}_{\text{term}}(\text{O}_3)^*$ |
|-------------------------------------------------|----------|------------------------------------------------------|------------------------------------------------------|--------------------------------------------------------|
| Nagoya (D)                                      | 18       | $+139.8 \pm 20.8$                                    | $+38.2 \pm 1.5$                                      | $+39.7 \pm 1.6$                                        |
| Nagoya (N)                                      | 18       | $+138.9 \pm 20.8$                                    | $+36.8 \pm 1.2$                                      | $+38.2 \pm 1.2$                                        |
| Niigata                                         | 20       | $+140.6 \pm 19.4$                                    | $+37.0 \pm 1.6$                                      | $+38.4 \pm 1.7$                                        |

<sup>a</sup> D and N denote the collection periods of daytime (06:00 to 18:00) and nighttime (18:00 to 6:00), respectively.

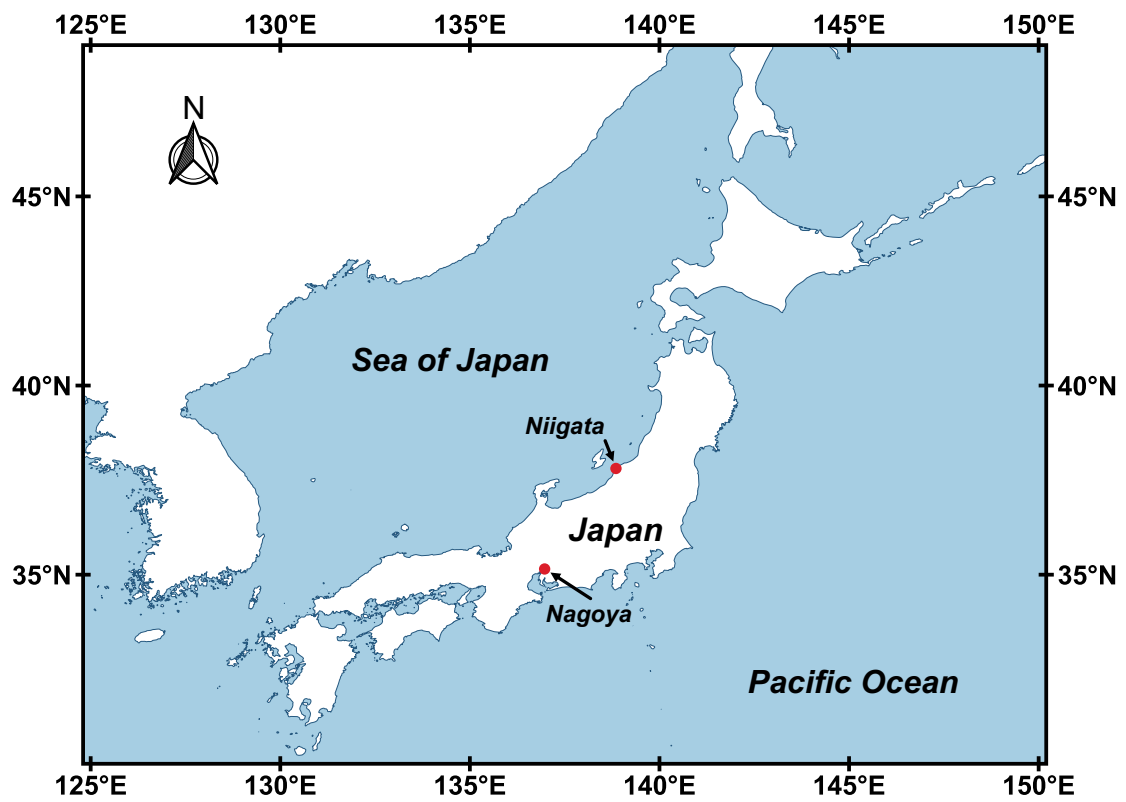

**Figure S1.** A map showing the location of study sites (Nagoya and Niigata) in Japan. The base layer of the map was obtained from <https://www.naturalearthdata.com/downloads/>.

**Table S2.** Activity concentrations of  $^7\text{Be}$  obtained from Environmental Radioactivity and Radiation in Japan as well as two-month weighted average of  $\Delta^{17}\text{O}_{\text{term}}(\text{O}_3)$  collected in Niigata and Nagoya.

| Location | period                          | $^7\text{Be}$ (mBq m $^{-3}$ ) | $10^3\Delta^{17}\text{O}_{\text{term}}(\text{O}_3)$ |
|----------|---------------------------------|--------------------------------|-----------------------------------------------------|
| Nagoya   | 10 Oct–19 Dec 2017 <sup>a</sup> | $4.8 \pm 0.060$                | $+37.7 \pm 0.2$ <sup>a</sup>                        |
|          | 9 Jan–23 Mar 2018 <sup>a</sup>  | $3.2 \pm 0.048$                | $+37.4 \pm 0.4$ <sup>a</sup>                        |
|          | 9 Apr–22 Jun 2018 <sup>a</sup>  | $4.1 \pm 0.055$                | $+38.7 \pm 0.4$ <sup>a</sup>                        |
|          | 7 Jan–3 Mar 2019                | $4.8 \pm 0.061$                | $+37.8 \pm 0.4$                                     |
|          | 11 Apr–18 Jun 2019              | $4.4 \pm 0.059$                | $+38.0 \pm 0.3$                                     |
|          | 10 Jul–20 Sep 2019              | $1.7 \pm 0.039$                | $+36.7 \pm 0.3$                                     |
|          | 9 Oct–20 Dec 2019               | $4.6 \pm 0.059$                | $+37.7 \pm 0.5$                                     |
|          | 9 Jan–18 Mar 2020               | $2.7 \pm 0.046$                | $+37.2 \pm 0.4$                                     |
|          | 16 Apr–16 Jun 2020              | $3.8 \pm 0.054$                | $+38.7 \pm 0.4$                                     |
| Niigata  | 9 Apr–6 Jun 2018                | $3.5 \pm 0.048$                | $+37.9 \pm 0.5$                                     |
|          | 2 Jul–6 Sep 2018                | $2.3 \pm 0.038$                | $+36.3 \pm 0.2$                                     |
|          | 2 Oct–13 Dec 2018               | $3.2 \pm 0.043$                | $+36.9 \pm 0.4$                                     |
|          | 7 Jan–6 Mar 2019                | $4.6 \pm 0.051$                | $+38.3 \pm 0.4$                                     |
|          | 10 Apr–6 Jun 2019               | $3.4 \pm 0.044$                | $+37.2 \pm 0.2$                                     |
|          | 8 Jul–6 Sep 2019                | $2.0 \pm 0.036$                | $+37.1 \pm 0.3$                                     |

<sup>a</sup> Calculated using sampling periods and the  $\text{O}_3$  data sets obtained in Xu et al. (2021) study
